# Supplementary material for: StrainIQ: A Novel n-Gram-Based Method for Taxonomic Profiling of Human Microbiota at the Strain Level
Source: MDPI journal article supplement (doi:10.3390/genes14081647), 2023-08-18
Supplement: s1 [file s1]

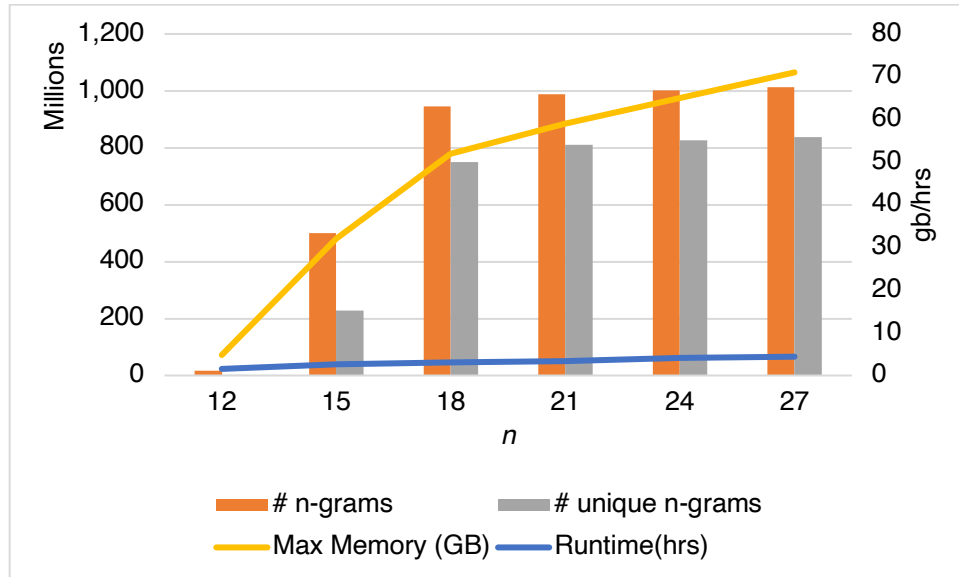

**Supplementary Figure 1: Correlation between the n-gram size and number of unique/common n-grams, memory requirement, and runtime using the GI tract reference genomes.** The x-axis represents the size of n-gram. The y-axis on the left is the number of n-grams in millions. The y-axis on the right shows the memory in gigabytes (GB) and processing times in hours.

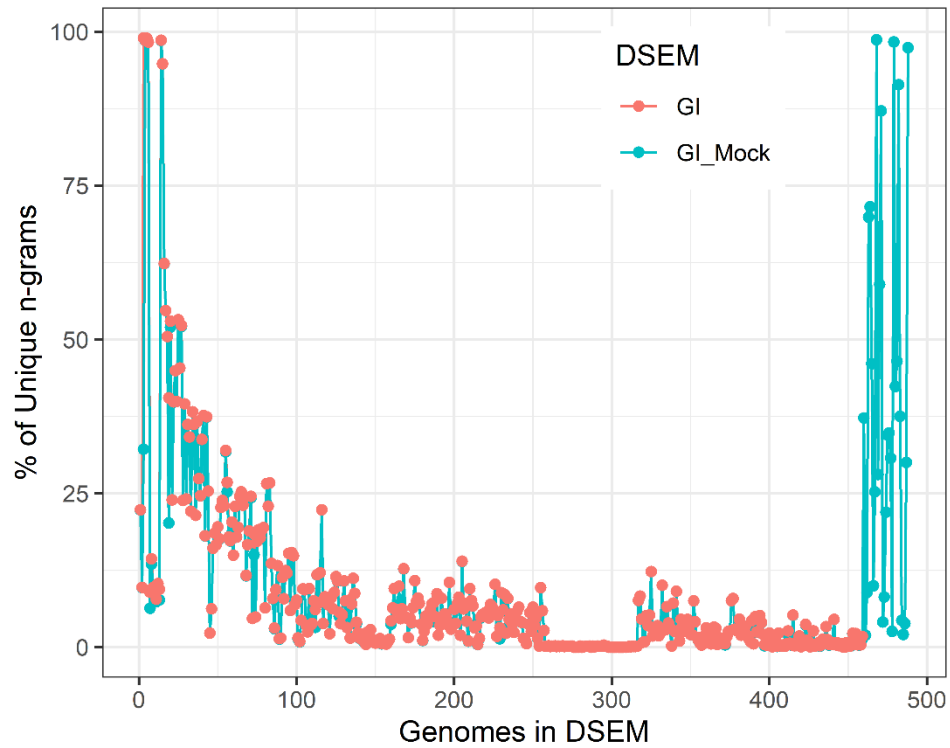

**Supplementary Figure 2: Visualization of the percentage of unique  $n$ -grams in DSEMs with only GI tract genomes (GI DSEM), and with GI tract and mock community genomes (GI Mock DSEM).** The green line/dot indicates the unique  $n$ -gram percentage in GI DSEM genomes, and the red line/dot indicates the unique  $n$ -gram percentage in GI Mock DSEM genomes. In the graph, dots corresponding to smaller unique  $n$ -gram percentages are overlaid by the larger percentage dots, and the red lines/dot at the right side of the graph correspond to mock community genomes present only in GI Mock DSEM.
