# Supplementary material for: StrainIQ: A Novel n-Gram-Based Method for Taxonomic Profiling of Human Microbiota at the Strain Level
Source: Genes (Basel). 2023 Aug 18;14(8):1647. doi: 10.3390/genes14081647 (PMC10454763; doi:10.3390/genes14081647)
Supplement: Supplementary file 1 [file genes-14-01647-s001.zip]

Archive with 4 entries (4 files):
- Supplementary Figures.pdf
- __MACOSX/._Supplementary Figures.pdf
- SupplementaryTables.xlsx
- __MACOSX/._SupplementaryTables.xlsx
