# Supplementary material for: StrainIQ: A Novel n-Gram-Based Method for Taxonomic Profiling of Human Microbiota at the Strain Level
Source: Genes (Basel). 2023 Aug 18;14(8):1647. doi: 10.3390/genes14081647 (PMC10454763; doi:10.3390/genes14081647)
Supplement: Supplementary file 1 [file genes-14-01647-s001.zip › SupplementaryTables.xlsx]

## Sheet: Supplementary Table 1
Supplementary Table 1: Number of unique/common n-grams, and the memory and time requirements for the n-gram generation from the GI tract reference genomes.
n-gram size	# n-grams	# unique n-grams	Max Memory (GB)	Runtime(hrs)	CPU
12	16768845	14933	4.8	1.54	Intel(R) Xeon(R) Gold2
15	500202450	227602558	32	2.63	Intel(R) Xeon(R) Gold
18	946341199	750230389	52	3.08	Intel(R) Xeon(R) Gold
21	988866457	809679392	59	3.41	Intel(R) Xeon(R) Gold
24	1002173023	825425923	65	4.07	Intel(R) Xeon(R) Gold
27	1012411275	837006517	71	4.4	Intel(R) Xeon(R) Gold
Intel(R) Xeon(R) Gold 6138 CPU @ 2.00GHz

## Sheet: Supplementary Table 2
Supplementary Table 2: Examples of weights assigned to unique and common n-grams based on the scoring function used while building DSEMs from the GI tract genomes.
For GI tract with (c=)488 genomes
n-gram	Weight (Sn)	# of genomes (c:nϵc)
n1	1	1
n2	0.547611	5
n3	0.394427	10
n4	0.135454	50
	0.0655711	100
	0	488

## Sheet: Supplementary Table 3
Supplementary Table 3: Details of the simulated datasets, set 1 to set 10 built from the GI tract genomes.
	# reads	# genomes	Simulation error model	base pair
set1	19991006	300	NovaSeq	150
set2	19990266	300	NovaSeq	150
set3	19991472	300	NovaSeq	150
set4	9993568	200	NovaSeq	150
set5	9993308	200	NovaSeq	150
set6	9993846	200	NovaSeq	150
set7	9994270	200	NovaSeq	150
set8	9992948	200	NovaSeq	150
set9	9993326	200	NovaSeq	150
set10	9994538	200	NovaSeq	150

## Sheet: Supplementary Table 4
Supplementary Table 4: The number of sequencing reads and n-grams generated for the mock communities used in this study.
Model	total ngrams	unique ngrams	% unique
gut/even (MSA-1003)	1028765615	845962585	0.822308
mix/staggered (MSA-1006)	1091950571	882145982	0.807863
Sequencing statistics of mock communities
Sample Name	Body Site	read count
MSA-1003_1	mix	34981088
MSA-1003_2	mix	42954950
MSA-1003_3	mix	39670082
MSA-1006_1	gut	37831270
MSA-1006_2	gut	38208832
MSA-1006_3	gut	36099148

## Sheet: Supplementary Table 5
Supplementary Table 5: Genome-wide distribution of non-repetitive and species-specific n-grams generated from 488 GI tract microbes and the mock community microbes (used for validation).
genome No.	genome ID	# non repetative n-grams	# unique n-grams	% unique n-grams
1	GCF_000003135.1	2366754	527731	22.2977
2	GCF_000010385.1	5064254	489439	9.66458
3	GCF_000143745.1	3187268	1024995	32.159
4	GCF_000145315.2	3571291	3519193	98.5412
5	GCF_000146325.1	1924613	1903245	98.8898
6	GCF_000146835.1	1676089	1647450	98.2913
7	GCF_000147295.1	2913976	184360	6.32675
8	GCF_000147455.1	2775118	375032	13.5141
9	GCF_000147475.1	2827289	264871	9.36837
10	GCF_000147495.1	2872359	257721	8.97245
11	GCF_000147595.1	2953068	219200	7.42279
12	GCF_000148065.1	3109470	295668	9.50863
13	GCF_000148225.1	2987831	229804	7.69133
14	GCF_000148995.1	2570703	2534722	98.6003
15	GCF_000153885.1	2830453	2682464	94.7715
16	GCF_000153905.1	5264812	3281162	62.3225
17	GCF_000153925.1	4575095	2501830	54.6837
18	GCF_000154065.1	5238277	2644431	50.4828
19	GCF_000154085.1	5189006	1046268	20.1632
20	GCF_000154105.1	6931876	3605393	52.0118
21	GCF_000154125.1	9310820	2225788	23.9054
22	GCF_000154205.1	7645012	3044848	39.8279
23	GCF_000154245.1	6112106	2746904	44.942
24	GCF_000154285.1	5097095	2034481	39.9145
25	GCF_000154305.1	6443148	3429130	53.2213
26	GCF_000154325.1	5743333	2603968	45.339
27	GCF_000154345.1	6041223	3148096	52.1102
28	GCF_000154365.1	9284485	2214024	23.8465
29	GCF_000154385.1	6626884	2620164	39.5384
30	GCF_000154405.1	6870364	1653150	24.062
31	GCF_000154425.1	8131647	2943244	36.1949
32	GCF_000154465.1	7086490	2419603	34.1439
33	GCF_000154485.1	8306004	1833524	22.0747
34	GCF_000154505.1	8781191	3357755	38.238
35	GCF_000154525.1	9151255	3304567	36.1105
36	GCF_000154545.1	9168268	1962598	21.4064
37	GCF_000154565.1	9412069	3450089	36.656
38	GCF_000154805.1	8425834	2307731	27.3888
39	GCF_000154825.1	9141884	2248954	24.6006
40	GCF_000154845.1	10444678	3514833	33.6519
41	GCF_000154865.1	11371261	4274353	37.5891
42	GCF_000154985.1	9547998	1726438	18.0817
43	GCF_000155085.1	10673795	3991000	37.3906
44	GCF_000155205.1	9706977	2461927	25.3624
45	GCF_000155395.1	10487794	239509	2.28369
46	GCF_000155415.1	11615945	724212	6.23464
47	GCF_000155455.1	9733039	1564199	16.071
48	GCF_000155475.1	11316029	2097335	18.5342
49	GCF_000155495.1	11221182	1865485	16.6247
50	GCF_000155515.2	12528713	2451331	19.5657
51	GCF_000155815.1	13558679	2380977	17.5605
52	GCF_000155855.1	12129946	2754943	22.7119
53	GCF_000155875.1	11952081	2849617	23.842
54	GCF_000155955.1	10973342	2520533	22.9696
55	GCF_000155975.1	14769953	4685054	31.7202
56	GCF_000155995.1	15825625	3993969	25.2374
57	GCF_000156015.1	12945693	2315849	17.889
58	GCF_000156055.1	13728020	2367624	17.2467
59	GCF_000156075.1	14761229	2739895	18.5614
60	GCF_000156175.1	11500527	1719719	14.9534
61	GCF_000156195.1	16456693	3761454	22.8567
62	GCF_000156215.1	12834899	2295418	17.8842
63	GCF_000156375.1	14184633	2753676	19.4131
64	GCF_000156395.1	14590787	3572077	24.4817
65	GCF_000156495.1	15563981	3929459	25.2471
66	GCF_000156515.1	16355040	3773070	23.0698
67	GCF_000156535.1	16197546	3936593	24.3036
68	GCF_000156635.1	15683932	1818949	11.5975
69	GCF_000156655.1	13901220	2316219	16.662
70	GCF_000156675.1	15146766	2858084	18.8693
71	GCF_000157015.1	18410692	4468784	24.2728
72	GCF_000157035.2	18666478	874045	4.68243
73	GCF_000157075.2	18335175	2756763	15.0354
74	GCF_000157095.2	21601695	1062015	4.91635
75	GCF_000157915.1	19659278	3383072	17.2085
76	GCF_000157935.1	17579673	3353675	19.077
77	GCF_000157955.1	17112536	3046341	17.8018
78	GCF_000157975.1	18318445	3478015	18.9864
79	GCF_000157995.1	18929285	3674999	19.4144
80	GCF_000158015.1	16908517	1078515	6.37853
81	GCF_000158035.1	23038504	6120915	26.5682
82	GCF_000158055.1	19458216	4454099	22.8906
83	GCF_000158075.1	22651787	6045349	26.6882
84	GCF_000158195.2	18838255	2561320	13.5964
85	GCF_000158235.1	17405397	1373493	7.89119
86	GCF_000158255.2	19149252	572864	2.99157
87	GCF_000158295.2	19516927	1827828	9.36535
88	GCF_000158315.2	23102833	3063225	13.2591
89	GCF_000158395.1	23116240	305793	1.32285
90	GCF_000158415.2	20327279	296018	1.45626
91	GCF_000158435.2	21141973	2401847	11.3606
92	GCF_000158455.1	20488076	1614226	7.87886
93	GCF_000158475.2	19580470	2435443	12.4381
94	GCF_000158495.1	19817422	2388138	12.0507
95	GCF_000158655.1	21725578	3316468	15.2653
96	GCF_000158835.2	20610763	1227365	5.95497
97	GCF_000159055.1	22928368	3521972	15.3608
98	GCF_000159075.2	28040081	4160045	14.8361
99	GCF_000159175.1	22578384	1557133	6.89657
100	GCF_000159215.1	22927418	1753800	7.64936
101	GCF_000159255.1	23585073	315877	1.33931
102	GCF_000159275.1	23527940	200158	0.850725
103	GCF_000159315.1	25711455	1118592	4.35056
104	GCF_000159375.2	21527741	2040699	9.47939
105	GCF_000159415.1	21978853	2044371	9.30154
106	GCF_000159455.2	21648819	773895	3.57477
107	GCF_000159475.2	24897027	623160	2.50295
108	GCF_000159495.1	24596030	2342809	9.52515
109	GCF_000159615.1	24670170	893062	3.62001
110	GCF_000159675.1	25281591	972634	3.8472
111	GCF_000159715.1	25031238	1879607	7.50905
112	GCF_000159855.2	27821543	897221	3.22491
113	GCF_000159875.2	29635120	3475530	11.7277
114	GCF_000159915.2	23580204	1689092	7.16318
115	GCF_000159975.2	29530742	3565259	12.073
116	GCF_000160095.1	28061358	6266510	22.3315
117	GCF_000160175.1	25065164	963475	3.84388
118	GCF_000160455.2	25635660	2103462	8.20522
119	GCF_000160575.1	25539758	1929772	7.55595
120	GCF_000160595.1	23276830	1601222	6.87904
121	GCF_000160715.1	26103555	568829	2.17912
122	GCF_000160835.1	27261176	2188240	8.02695
123	GCF_000160855.1	26693621	1660492	6.22056
124	GCF_000162015.1	27634638	2469301	8.93553
125	GCF_000162075.1	28606801	3253122	11.3718
126	GCF_000162115.1	28767281	3083311	10.7181
127	GCF_000162135.1	30735314	1547779	5.03583
128	GCF_000162155.1	29169525	1113222	3.81639
129	GCF_000162275.1	33264934	1746888	5.25144
130	GCF_000162515.1	32327764	3470514	10.7354
131	GCF_000162555.1	30030003	2251501	7.49751
132	GCF_000163655.1	28870911	921101	3.19041
133	GCF_000163735.1	27223149	2063833	7.58117
134	GCF_000163915.2	31679232	461272	1.45607
135	GCF_000163935.1	29667055	2072201	6.98486
136	GCF_000163955.1	31417107	3514333	11.186
137	GCF_000164115.1	31367819	2742435	8.74283
138	GCF_000164175.1	32768494	1230513	3.75517
139	GCF_000164195.1	36827006	851916	2.31329
140	GCF_000164215.1	32895885	477011	1.45006
141	GCF_000164235.1	31998143	587255	1.83528
142	GCF_000164255.1	34626600	389854	1.12588
143	GCF_000164275.1	34348942	276468	0.804881
144	GCF_000164295.1	33030595	152035	0.460285
145	GCF_000164315.1	36546021	889892	2.43499
146	GCF_000164335.1	35101716	272649	0.77674
147	GCF_000164355.1	34126448	963605	2.82363
148	GCF_000164375.1	34160966	313949	0.919028
149	GCF_000164415.1	38303244	426498	1.11348
150	GCF_000164435.1	35405170	223969	0.632588
151	GCF_000164455.1	37060554	269335	0.726743
152	GCF_000164475.1	37586072	259045	0.689205
153	GCF_000164495.1	33509377	461031	1.37583
154	GCF_000164515.1	35099799	192017	0.54706
155	GCF_000164535.1	36532277	231991	0.63503
156	GCF_000164555.1	38000420	337507	0.888166
157	GCF_000164575.1	40414056	195257	0.483141
158	GCF_000164595.1	38156742	320495	0.839943
159	GCF_000164615.1	38659100	502859	1.30075
160	GCF_000164655.1	36877497	1375909	3.73103
161	GCF_000166035.1	39443146	2519001	6.38641
162	GCF_000169015.1	42652396	4053397	9.50333
163	GCF_000169035.1	36495101	2170517	5.94742
164	GCF_000169235.1	37267851	2249396	6.03575
165	GCF_000169255.2	39587546	3925320	9.91554
166	GCF_000169475.1	41001727	1894076	4.6195
167	GCF_000172135.1	39652280	2466272	6.21975
168	GCF_000172175.1	39473165	5025537	12.7315
169	GCF_000173355.1	36959637	1831578	4.95562
170	GCF_000173375.1	41628058	1947358	4.67799
171	GCF_000173415.1	40499207	633615	1.56451
172	GCF_000173435.1	39542277	1840359	4.65416
173	GCF_000173455.1	41497552	1623040	3.91117
174	GCF_000173795.1	40649143	2605761	6.41037
175	GCF_000173815.1	41028792	4424886	10.7848
176	GCF_000173975.1	41856963	3084030	7.36802
177	GCF_000174195.1	44416354	3543493	7.9779
178	GCF_000177015.3	39998367	2859979	7.15024
179	GCF_000178475.1	39691190	1476998	3.72122
180	GCF_000178935.2	38508688	410705	1.06653
181	GCF_000183585.1	45708860	1193083	2.61018
182	GCF_000185325.1	43743060	2220239	5.07564
183	GCF_000185345.1	42618437	1594412	3.74113
184	GCF_000185605.1	47097317	2430277	5.16012
185	GCF_000185705.2	43940856	2666446	6.06826
186	GCF_000185845.1	42787987	3016163	7.04909
187	GCF_000186105.1	44751103	1854828	4.14476
188	GCF_000186505.1	43562249	2155593	4.94831
189	GCF_000186525.1	42288629	3667417	8.67235
190	GCF_000186545.1	44417705	853587	1.92173
191	GCF_000187265.1	43563900	1539991	3.53502
192	GCF_000187895.1	48053003	3826753	7.96361
193	GCF_000188175.1	42603733	2020533	4.74262
194	GCF_000188195.1	42293594	2284301	5.40106
195	GCF_000189595.1	44622621	2141263	4.7986
196	GCF_000189615.1	49067899	1773101	3.61357
197	GCF_000190355.1	48857659	5147341	10.5354
198	GCF_000191805.1	44047476	1279117	2.90395
199	GCF_000191845.1	46135277	1681977	3.64575
200	GCF_000191865.1	47353842	2912220	6.14991
201	GCF_000192165.1	47568412	1827846	3.84256
202	GCF_000195615.1	47262170	3325514	7.03631
203	GCF_000195635.1	48225599	3901729	8.09058
204	GCF_000195655.1	52562838	1019922	1.94039
205	GCF_000204455.1	49539107	6908327	13.9452
206	GCF_000205025.1	45112639	2802834	6.21297
207	GCF_000205165.1	46058211	3266727	7.09261
208	GCF_000209385.2	49736477	2097941	4.21811
209	GCF_000213135.1	46343655	444002	0.958064
210	GCF_000213555.1	53150663	5054164	9.50913
211	GCF_000213575.1	51285704	3893533	7.59185
212	GCF_000214295.1	52398954	3520171	6.71802
213	GCF_000218365.1	50264796	1577541	3.13846
214	GCF_000218465.1	53094263	1826053	3.43927
215	GCF_000218645.2	48442159	210057	0.433624
216	GCF_000218655.1	47728615	669751	1.40325
217	GCF_000220865.1	51695336	2450286	4.73986
218	GCF_000224655.1	51696126	2749184	5.31797
219	GCF_000225705.1	47077608	2385717	5.06763
220	GCF_000225745.1	49789011	2817592	5.65906
221	GCF_000231275.1	51065906	2822979	5.52811
222	GCF_000233455.1	55414698	2638983	4.76224
223	GCF_000233955.1	52626118	3642171	6.92084
224	GCF_000234155.1	57920132	3851463	6.64961
225	GCF_000234175.1	50174111	3020601	6.02024
226	GCF_000235505.1	53261996	5435262	10.2048
227	GCF_000235865.1	54544525	950961	1.74346
228	GCF_000235885.1	54348027	2800386	5.15269
229	GCF_000235905.1	57077794	780639	1.36768
230	GCF_000238035.1	58328111	5162476	8.85075
231	GCF_000238615.1	52769529	3216612	6.09559
232	GCF_000239255.1	55896547	4757614	8.51146
233	GCF_000239295.1	55484677	1256482	2.26456
234	GCF_000239335.1	54388266	4285213	7.87893
235	GCF_000239735.1	56310291	2510071	4.45757
236	GCF_000241405.1	53058374	2845028	5.36207
237	GCF_000242155.1	60041640	2244271	3.73786
238	GCF_000242195.1	56970953	1369310	2.40352
239	GCF_000242435.1	52587480	2303983	4.38124
240	GCF_000243175.1	57782911	3383644	5.85579
241	GCF_000243215.1	56490986	3676873	6.50878
242	GCF_000245775.1	59573883	2469293	4.14493
243	GCF_000250875.1	57770252	2311683	4.00151
244	GCF_000261205.1	60476941	875656	1.44792
245	GCF_000261265.1	60857751	753789	1.23861
246	GCF_000273525.1	57669278	338390	0.586777
247	GCF_000296445.1	55344283	2060340	3.72277
248	GCF_000296465.1	56410358	3168152	5.61626
249	GCF_000297775.1	55127001	1427850	2.59011
250	GCF_000297815.1	60317054	3927106	6.51077
251	GCF_000300935.1	61276325	2134053	3.48267
252	GCF_000300955.1	63456906	3040380	4.79125
253	GCF_000307475.1	59482632	849116	1.4275
254	GCF_000310005.2	61200732	102369	0.167268
255	GCF_000315485.1	63831067	6171481	9.66846
256	GCF_000320405.1	58886147	3481027	5.91145
257	GCF_000332875.2	63617580	1739641	2.73453
258	GCF_000344945.2	62079261	82274	0.132531
259	GCF_000344965.2	59380769	111222	0.187303
260	GCF_000344985.2	59328565	117684	0.19836
261	GCF_000345005.2	58103601	50185	0.0863716
262	GCF_000345025.2	61651172	105538	0.171186
263	GCF_000345045.2	62369569	89301	0.14318
264	GCF_000345065.2	58013262	126222	0.217574
265	GCF_000345085.2	63353499	73496	0.116009
266	GCF_000345105.2	56776859	91204	0.160636
267	GCF_000345125.2	60512236	72527	0.119855
268	GCF_000345145.2	60517369	74683	0.123408
269	GCF_000345165.2	62816259	131421	0.209215
270	GCF_000345185.2	59302762	62227	0.104931
271	GCF_000345205.2	61939418	87767	0.141698
272	GCF_000345225.2	63184730	96593	0.152874
273	GCF_000345245.2	65259170	86065	0.131882
274	GCF_000345265.2	58098587	96639	0.166336
275	GCF_000345285.2	64157609	103527	0.161364
276	GCF_000345305.2	58977869	85	0.000144122
277	GCF_000345325.2	60458587	232	0.000383734
278	GCF_000345345.2	61394262	538	0.000876303
279	GCF_000345365.2	63645204	175	0.000274962
280	GCF_000345385.2	61334653	109753	0.178941
281	GCF_000345405.2	63098333	390	0.000618083
282	GCF_000345425.2	60868510	37146	0.0610266
283	GCF_000345445.2	60230773	62285	0.103411
284	GCF_000345465.2	63926278	81363	0.127276
285	GCF_000345485.2	64814369	98764	0.15238
286	GCF_000345505.2	66522881	121272	0.182301
287	GCF_000345525.2	62897470	3521	0.005598
288	GCF_000345545.2	58957806	99837	0.169336
289	GCF_000345565.2	59694178	43372	0.072657
290	GCF_000345585.2	65047741	86248	0.132592
291	GCF_000345605.2	62102420	118948	0.191535
292	GCF_000345625.2	61488680	86509	0.140691
293	GCF_000345645.2	64034242	79675	0.124426
294	GCF_000345665.2	61946852	128079	0.206756
295	GCF_000345685.2	64426397	207415	0.321941
296	GCF_000345705.2	64407340	82749	0.128478
297	GCF_000345725.2	61949439	85705	0.138347
298	GCF_000345745.2	65462135	223	0.000340655
299	GCF_000345765.2	60864904	196	0.000322025
300	GCF_000345785.2	67372732	204	0.000302793
301	GCF_000345805.2	64163175	703	0.00109564
302	GCF_000345825.2	59582931	610	0.00102378
303	GCF_000345845.2	62316305	1479	0.00237338
304	GCF_000345865.2	66191446	628	0.000948763
305	GCF_000345885.2	60667736	168	0.000276918
306	GCF_000345905.2	62466307	624	0.000998939
307	GCF_000345925.2	64853333	1182	0.00182257
308	GCF_000345945.2	65007012	5565	0.00856061
309	GCF_000345965.2	65265239	472	0.000723203
310	GCF_000345985.2	62461448	3957	0.00633511
311	GCF_000346005.2	64849552	58599	0.0903615
312	GCF_000346025.2	62381037	38568	0.0618265
313	GCF_000346815.2	65968168	92421	0.140099
314	GCF_000346835.2	61280859	64510	0.105269
315	GCF_000346855.2	67988892	75051	0.110387
316	GCF_000346875.2	65111695	87880	0.134968
317	GCF_000381365.1	64769232	4901492	7.56762
318	GCF_000382465.1	66421177	5518825	8.30883
319	GCF_000398925.1	68224815	3139910	4.6023
320	GCF_000400875.1	68408446	547618	0.800512
321	GCF_000411235.1	64908576	583037	0.898243
322	GCF_000411255.1	68585752	3526602	5.14189
323	GCF_000411275.1	67257549	2351864	3.4968
324	GCF_000411295.1	65925806	3442988	5.22252
325	GCF_000411315.1	74503813	9144371	12.2737
326	GCF_000411335.1	67730398	1226732	1.8112
327	GCF_000411355.1	65116902	1854987	2.8487
328	GCF_000411395.1	68175283	2196175	3.22137
329	GCF_000411415.1	67497655	2145776	3.17904
330	GCF_000411435.1	63753149	1186596	1.86124
331	GCF_000411475.1	69712054	1642643	2.35633
332	GCF_000411495.1	76157225	7663124	10.0622
333	GCF_000411515.1	71070686	2144438	3.01733
334	GCF_000411535.1	69284179	1931385	2.78763
335	GCF_000412335.2	69703341	4549799	6.52738
336	GCF_000413355.1	71037066	2787153	3.92352
337	GCF_000413375.1	72056904	2326669	3.22893
338	GCF_000455765.1	68164154	114251	0.167612
339	GCF_000466385.1	72993349	5243816	7.18396
340	GCF_000466445.2	68045805	1708198	2.51036
341	GCF_000466465.2	71722528	6512274	9.07982
342	GCF_000466485.1	70678708	1889953	2.67401
343	GCF_000466525.1	71439784	711287	0.995646
344	GCF_000466565.1	71701643	3232098	4.5077
345	GCF_000466605.1	75114724	2963290	3.94502
346	GCF_000468015.1	67780758	2970048	4.38185
347	GCF_000469305.1	73004831	1859298	2.54682
348	GCF_000469345.1	69817153	3143266	4.50214
349	GCF_000469365.1	73495432	2442002	3.32266
350	GCF_000469425.1	74986364	1534553	2.04644
351	GCF_000469445.2	76567254	1529380	1.99743
352	GCF_000478505.2	74203021	5568775	7.50478
353	GCF_000479045.1	72752343	2998866	4.12202
354	GCF_000479185.1	70475781	1141939	1.62033
355	GCF_000479205.1	77217646	877161	1.13596
356	GCF_000479225.1	75346989	492866	0.654128
357	GCF_000479245.1	75467117	245461	0.325256
358	GCF_000479265.1	70007288	491879	0.702611
359	GCF_000479285.1	73053098	464139	0.635345
360	GCF_000507845.1	74039022	2322863	3.13735
361	GCF_000507865.1	71715603	1864975	2.60051
362	GCF_000517745.1	78577171	1239448	1.57736
363	GCF_000517805.1	80442643	443572	0.551414
364	GCF_000523555.1	74222010	1152906	1.55332
365	GCF_000527215.1	83039332	2692779	3.24278
366	GCF_000527235.1	81055876	2509111	3.09553
367	GCF_000527255.1	73089755	331888	0.454083
368	GCF_000527275.1	78911697	1216256	1.54129
369	GCF_000527295.1	80593067	474411	0.58865
370	GCF_000527315.1	76709748	995192	1.29735
371	GCF_000527335.1	79491509	530616	0.667513
372	GCF_000690925.1	72272197	266980	0.369409
373	GCF_000760655.1	75950491	1295330	1.70549
374	GCF_000763035.1	76697947	1973674	2.57331
375	GCF_000763055.1	76225474	2013563	2.64159
376	GCF_000969835.1	80545159	6078398	7.54657
377	GCF_000969845.1	80886962	6403360	7.91643
378	GCF_001078315.1	81026213	2367635	2.92206
379	GCF_001078425.1	82722674	2248181	2.71773
380	GCF_001078435.1	86602137	2316935	2.67538
381	GCF_001078445.1	77605039	3538400	4.5595
382	GCF_001078555.1	81730803	1585293	1.93965
383	GCF_001185845.1	84966349	2322525	2.73346
384	GCF_001571425.1	82387963	2836211	3.44251
385	GCF_001578555.1	84949914	2905161	3.41985
386	GCF_001578585.1	75649160	1452456	1.91999
387	GCF_001578645.1	79790462	1101090	1.37998
388	GCF_001580195.1	79048896	709072	0.897004
389	GCF_001641065.1	84881912	3673604	4.3279
390	GCF_001647615.1	86134269	455305	0.528599
391	GCF_001807055.1	85454403	4221981	4.94062
392	GCF_001807785.1	84540016	2083727	2.46478
393	GCF_001807865.1	79748442	3934560	4.93371
394	GCF_001807895.1	83511716	4292596	5.14011
395	GCF_001808325.1	86090440	3429903	3.98407
396	GCF_001808745.1	81864841	1703392	2.08074
397	GCF_001808795.1	86995243	188786	0.217007
398	GCF_001809065.1	88533733	296302	0.334677
399	GCF_001809145.1	83695902	282058	0.337003
400	GCF_001809445.1	86706316	1987220	2.2919
401	GCF_001809485.1	87755365	867309	0.988326
402	GCF_001809495.1	80090742	63064	0.0787407
403	GCF_001809645.1	89550257	659825	0.736821
404	GCF_001810115.1	87458621	725870	0.829958
405	GCF_001810435.1	85156802	80141	0.0941099
406	GCF_001810475.1	85278345	1946052	2.282
407	GCF_001810595.1	87792208	324364	0.369468
408	GCF_001810625.1	84190994	136597	0.162247
409	GCF_001810915.1	88166469	260240	0.295169
410	GCF_001811035.1	90476252	138565	0.153151
411	GCF_001811205.1	82166507	434387	0.528667
412	GCF_001811225.1	92975987	1871201	2.01256
413	GCF_001811285.1	86327441	575185	0.666283
414	GCF_001811595.1	81484266	289829	0.355687
415	GCF_001811695.1	93684553	4868767	5.19698
416	GCF_001811715.1	89090482	203116	0.227988
417	GCF_001811805.1	87585485	491303	0.560941
418	GCF_001811815.1	91897166	693462	0.754607
419	GCF_001812015.1	89459864	1637625	1.83057
420	GCF_001812445.1	92886005	68847	0.0741199
421	GCF_001812505.1	90619958	1069019	1.17967
422	GCF_001812535.1	86018482	407867	0.474162
423	GCF_001813025.1	92081936	3285829	3.56838
424	GCF_001813035.1	86109217	977887	1.13564
425	GCF_001813195.1	88590941	763216	0.861506
426	GCF_001813255.1	84652284	58772	0.0694275
427	GCF_001813275.1	91353031	185765	0.203348
428	GCF_001813405.1	88813863	2342013	2.63699
429	GCF_001813585.1	94351276	161780	0.171466
430	GCF_001813745.1	83377451	253098	0.303557
431	GCF_001813905.1	95438027	644274	0.675071
432	GCF_001814065.1	91035576	137867	0.151443
433	GCF_001814235.1	87370104	355755	0.407182
434	GCF_001814745.1	93894979	1147176	1.22177
435	GCF_001814765.1	88262188	983454	1.11424
436	GCF_001814855.1	93842396	3129232	3.33456
437	GCF_001815345.1	91100062	1142027	1.2536
438	GCF_001815665.1	91588207	324661	0.354479
439	GCF_001815745.1	93478889	389313	0.416472
440	GCF_001815825.1	86081209	604108	0.701788
441	GCF_001815925.1	98866393	4451860	4.50291
442	GCF_001835885.1	94076109	338494	0.359809
443	GCF_001836465.1	90111828	634220	0.703814
444	GCF_001836495.1	84871572	216971	0.255646
445	GCF_001836545.1	96190767	315371	0.32786
446	GCF_001836595.1	98166949	314211	0.320078
447	GCF_001837035.1	95365230	22771	0.0238777
448	GCF_001837075.1	90651060	32886	0.0362776
449	GCF_001837115.1	93853009	609941	0.64989
450	GCF_001837215.1	96206509	629020	0.653823
451	GCF_001837535.1	87043415	115829	0.13307
452	GCF_001838125.1	94722536	215781	0.227803
453	GCF_001838135.1	93808341	2066341	2.20273
454	GCF_001838215.1	94556798	632447	0.668854
455	GCF_001838615.1	96210027	2117468	2.20088
456	GCF_001839265.1	97847557	353758	0.36154
457	GCF_001839285.1	91838753	313884	0.341777
458	GCF_001839345.1	97595171	352179	0.360857
459	GCF_001857645.1	93657055	1251569	1.33633
460	Bifidobacterium adolescentis ATCC 15703	2067125	769535	37.2273
461	Escherichia coli ATCC 700926	9418529	180987	1.92161
462	Helicobacter pylori ATCC 700392	6180584	546669	8.84494
463	Acinetobacter baumannii ATCC 17978	5668133	3960998	69.8819
464	Bacillus cereus ATCC 10987	7413028	5303691	71.5455
465	Bacteroides fragilis ATCC 25285	5203342	2397177	46.0699
466	Bacteroides vulgatus ATCC 8482	5041713	503179	9.98032
467	Clostridioides difficile ATCC 9689	4205468	1061735	25.2465
468	Clostridium beijerinckii ATCC 35702	5867260	5791691	98.712
469	Cutibacterium acnes ATCC 11828	8805494	2469928	28.0499
470	Deinococcus radiodurans ATCC BAA 816	5448125	3211750	58.9515
471	Enterobacter cloacae subsp cloacae ATCC 13047	5466481	4763541	87.1409
472	Enterococcus faecalis ATCC 47077	4857221	198852	4.09395
473	Enterococcus faecalis ATCC 700802	3306074	269069	8.13863
474	Fusobacterium nucleatum subsp nucleatum ATCC 25586	2141474	469751	21.9359
475	Lactiplantibacillus plantarum ATCC BAA 793	3306910	1139589	34.4608
476	Lactobacillus gasseri ATCC 33323	5130270	1786342	34.8196
477	Neisseria meningitidis ATCC BAA 335	6316025	1939452	30.7068
478	Phocaeicola vulgatus ATCC 8482	10176784	261192	2.56655
479	Porphyromonas gingivalis ATCC 33277	2213470	2176966	98.3508
480	Pseudomonas aeruginosa ATCC 9027	10884473	4609633	42.3505
481	Rhodobacter sphaeroides ATCC 17029	9477576	4403102	46.4581
482	Salmonella enterica subsp enterica ATCC 9150	4536490	4145461	91.3804
483	Schaalia odontolytica ATCC 17982	5682205	2131957	37.5199
484	Staphylococcus aureus subsp aureus ATCC BAA 1556	4935593	215675	4.36979
485	Staphylococcus epidermidis ATCC 12228	8376933	173174	2.06727
486	Streptococcus agalactiae ATCC BAA 611	7036210	270332	3.84201
487	Streptococcus mutans ATCC 700610	6522429	1958467	30.0267
488	Yersinia enterocolitica ATCC 27729	4523264	4406846	97.4262

## Sheet: Supplementary Table 6
Supplementary Table 6: The distribution of unique and common n-grams of the GI tract reference genomes (N= 459).
genome No.	genome ID	# of unique n-grams	# non repetative n-grams	% unique n-grams
1	GCF_000003135.1	528471	2366754	22.3289
2	GCF_000010385.1	490734	5064254	9.69015
3	GCF_000143745.1	3154376	3187268	98.968
4	GCF_000145315.2	3520504	3571291	98.5779
5	GCF_000146325.1	1904106	1924613	98.9345
6	GCF_000146835.1	1648039	1676089	98.3265
7	GCF_000147295.1	259764	2913976	8.91442
8	GCF_000147455.1	398465	2775118	14.3585
9	GCF_000147475.1	273797	2827289	9.68408
10	GCF_000147495.1	281755	2872359	9.80918
11	GCF_000147595.1	230628	2953068	7.80978
12	GCF_000148065.1	321800	3109470	10.349
13	GCF_000148225.1	280904	2987831	9.4016
14	GCF_000148995.1	2535690	2570703	98.638
15	GCF_000153885.1	2683342	2830453	94.8026
16	GCF_000153905.1	3281655	5264812	62.3319
17	GCF_000153925.1	2502499	4575095	54.6983
18	GCF_000154065.1	2644884	5238277	50.4915
19	GCF_000154085.1	2102030	5189006	40.5093
20	GCF_000154105.1	3673427	6931876	52.9933
21	GCF_000154125.1	2226404	9310820	23.912
22	GCF_000154205.1	3047953	7645012	39.8685
23	GCF_000154245.1	2747289	6112106	44.9483
24	GCF_000154285.1	2034933	5097095	39.9234
25	GCF_000154305.1	3429511	6443148	53.2273
26	GCF_000154325.1	2604228	5743333	45.3435
27	GCF_000154345.1	3158314	6041223	52.2794
28	GCF_000154365.1	2214228	9284485	23.8487
29	GCF_000154385.1	2621396	6626884	39.557
30	GCF_000154405.1	1654072	6870364	24.0755
31	GCF_000154425.1	2943534	8131647	36.1985
32	GCF_000154465.1	2420574	7086490	34.1576
33	GCF_000154485.1	1834293	8306004	22.0839
34	GCF_000154505.1	3358268	8781191	38.2439
35	GCF_000154525.1	3313189	9151255	36.2048
36	GCF_000154545.1	1963472	9168268	21.416
37	GCF_000154565.1	3450854	9412069	36.6641
38	GCF_000154805.1	2309121	8425834	27.4053
39	GCF_000154825.1	2249729	9141884	24.609
40	GCF_000154845.1	3527169	10444678	33.77
41	GCF_000154865.1	4276893	11371261	37.6114
42	GCF_000154985.1	1728850	9547998	18.1069
43	GCF_000155085.1	3995596	10673795	37.4337
44	GCF_000155205.1	2462265	9706977	25.3659
45	GCF_000155395.1	239725	10487794	2.28575
46	GCF_000155415.1	725599	11615945	6.24658
47	GCF_000155455.1	1564641	9733039	16.0756
48	GCF_000155475.1	2097658	11316029	18.5371
49	GCF_000155495.1	1865951	11221182	16.6288
50	GCF_000155515.2	2451732	12528713	19.5689
51	GCF_000155815.1	2383616	13558679	17.58
52	GCF_000155855.1	2755290	12129946	22.7148
53	GCF_000155875.1	2850071	11952081	23.8458
54	GCF_000155955.1	2521636	10973342	22.9797
55	GCF_000155975.1	4719516	14769953	31.9535
56	GCF_000155995.1	4238394	15825625	26.7818
57	GCF_000156015.1	2316297	12945693	17.8924
58	GCF_000156055.1	2370303	13728020	17.2662
59	GCF_000156075.1	2998576	14761229	20.3139
60	GCF_000156175.1	1720511	11500527	14.9603
61	GCF_000156195.1	3765574	16456693	22.8817
62	GCF_000156215.1	2296311	12834899	17.8911
63	GCF_000156375.1	2755013	14184633	19.4225
64	GCF_000156395.1	3574499	14590787	24.4983
65	GCF_000156495.1	3932323	15563981	25.2655
66	GCF_000156515.1	3773448	16355040	23.0721
67	GCF_000156535.1	3937300	16197546	24.308
68	GCF_000156635.1	1829028	15683932	11.6618
69	GCF_000156655.1	2317075	13901220	16.6681
70	GCF_000156675.1	2858628	15146766	18.8729
71	GCF_000157015.1	4510459	18410692	24.4991
72	GCF_000157035.2	874344	18666478	4.68403
73	GCF_000157075.2	3369823	18335175	18.379
74	GCF_000157095.2	1063085	21601695	4.9213
75	GCF_000157915.1	3385715	19659278	17.222
76	GCF_000157935.1	3354391	17579673	19.0811
77	GCF_000157955.1	3047190	17112536	17.8068
78	GCF_000157975.1	3479539	18318445	18.9947
79	GCF_000157995.1	3675674	18929285	19.4179
80	GCF_000158015.1	1080134	16908517	6.38811
81	GCF_000158035.1	6122784	23038504	26.5763
82	GCF_000158055.1	4457211	19458216	22.9066
83	GCF_000158075.1	6046465	22651787	26.6931
84	GCF_000158195.2	2562985	18838255	13.6052
85	GCF_000158235.1	1374017	17405397	7.8942
86	GCF_000158255.2	596928	19149252	3.11724
87	GCF_000158295.2	1828303	19516927	9.36778
88	GCF_000158315.2	3064591	23102833	13.265
89	GCF_000158395.1	317969	23116240	1.37552
90	GCF_000158415.2	300363	20327279	1.47764
91	GCF_000158435.2	2402234	21141973	11.3624
92	GCF_000158455.1	1614540	20488076	7.88039
93	GCF_000158475.2	2436190	19580470	12.4419
94	GCF_000158495.1	2388991	19817422	12.055
95	GCF_000158655.1	3317356	21725578	15.2694
96	GCF_000158835.2	1228168	20610763	5.95887
97	GCF_000159055.1	3522563	22928368	15.3633
98	GCF_000159075.2	4163094	28040081	14.8469
99	GCF_000159175.1	1557567	22578384	6.89849
100	GCF_000159215.1	1754162	22927418	7.65094
101	GCF_000159255.1	356564	23585073	1.51182
102	GCF_000159275.1	216585	23527940	0.920544
103	GCF_000159315.1	1118853	25711455	4.35157
104	GCF_000159375.2	2041275	21527741	9.48207
105	GCF_000159415.1	2048118	21978853	9.31858
106	GCF_000159455.2	774506	21648819	3.57759
107	GCF_000159475.2	623353	24897027	2.50372
108	GCF_000159495.1	2343197	24596030	9.52673
109	GCF_000159615.1	893337	24670170	3.62112
110	GCF_000159675.1	973196	25281591	3.84943
111	GCF_000159715.1	1883427	25031238	7.52431
112	GCF_000159855.2	1702108	27821543	6.11795
113	GCF_000159875.2	3495582	29635120	11.7954
114	GCF_000159915.2	1690083	23580204	7.16738
115	GCF_000159975.2	3565737	29530742	12.0747
116	GCF_000160095.1	6267174	28061358	22.3338
117	GCF_000160175.1	964012	25065164	3.84602
118	GCF_000160455.2	2103699	25635660	8.20614
119	GCF_000160575.1	1930404	25539758	7.55843
120	GCF_000160595.1	1602384	23276830	6.88403
121	GCF_000160715.1	569123	26103555	2.18025
122	GCF_000160835.1	2189329	27261176	8.03094
123	GCF_000160855.1	1663550	26693621	6.23201
124	GCF_000162015.1	2471027	27634638	8.94177
125	GCF_000162075.1	3282644	28606801	11.475
126	GCF_000162115.1	3092207	28767281	10.749
127	GCF_000162135.1	1748600	30735314	5.68922
128	GCF_000162155.1	1113563	29169525	3.81756
129	GCF_000162275.1	1754247	33264934	5.27356
130	GCF_000162515.1	3480377	32327764	10.7659
131	GCF_000162555.1	2256854	30030003	7.51533
132	GCF_000163655.1	922274	28870911	3.19447
133	GCF_000163735.1	2064265	27223149	7.58276
134	GCF_000163915.2	467244	31679232	1.47492
135	GCF_000163935.1	2076714	29667055	7.00007
136	GCF_000163955.1	3520769	31417107	11.2065
137	GCF_000164115.1	2743024	31367819	8.74471
138	GCF_000164175.1	1330864	32768494	4.06141
139	GCF_000164195.1	856932	36827006	2.32691
140	GCF_000164215.1	481346	32895885	1.46324
141	GCF_000164235.1	601986	31998143	1.88132
142	GCF_000164255.1	396058	34626600	1.1438
143	GCF_000164275.1	289493	34348942	0.8428
144	GCF_000164295.1	152454	33030595	0.461554
145	GCF_000164315.1	899730	36546021	2.46191
146	GCF_000164335.1	277236	35101716	0.789808
147	GCF_000164355.1	967130	34126448	2.83396
148	GCF_000164375.1	316026	34160966	0.925108
149	GCF_000164415.1	428259	38303244	1.11808
150	GCF_000164435.1	224673	35405170	0.634577
151	GCF_000164455.1	273378	37060554	0.737652
152	GCF_000164475.1	276254	37586072	0.73499
153	GCF_000164495.1	462245	33509377	1.37945
154	GCF_000164515.1	209193	35099799	0.595995
155	GCF_000164535.1	233045	36532277	0.637915
156	GCF_000164555.1	374554	38000420	0.985658
157	GCF_000164575.1	195967	40414056	0.484898
158	GCF_000164595.1	321070	38156742	0.84145
159	GCF_000164615.1	507099	38659100	1.31172
160	GCF_000164655.1	1586181	36877497	4.30122
161	GCF_000166035.1	2519655	39443146	6.38807
162	GCF_000169015.1	4058641	42652396	9.51562
163	GCF_000169035.1	2171299	36495101	5.94956
164	GCF_000169235.1	2249718	37267851	6.03662
165	GCF_000169255.2	3926382	39587546	9.91823
166	GCF_000169475.1	1894320	41001727	4.6201
167	GCF_000172135.1	2469496	39652280	6.22788
168	GCF_000172175.1	5034165	39473165	12.7534
169	GCF_000173355.1	1832522	36959637	4.95817
170	GCF_000173375.1	1948398	41628058	4.68049
171	GCF_000173415.1	633974	40499207	1.5654
172	GCF_000173435.1	1868684	39542277	4.72579
173	GCF_000173455.1	1641116	41497552	3.95473
174	GCF_000173795.1	2606823	40649143	6.41298
175	GCF_000173815.1	4425629	41028792	10.7866
176	GCF_000173975.1	3084763	41856963	7.36977
177	GCF_000174195.1	3544674	44416354	7.98056
178	GCF_000177015.3	2860573	39998367	7.15172
179	GCF_000178475.1	1480876	39691190	3.73099
180	GCF_000178935.2	434211	38508688	1.12757
181	GCF_000183585.1	1193435	45708860	2.61095
182	GCF_000185325.1	2221441	43743060	5.07839
183	GCF_000185345.1	1594785	42618437	3.74201
184	GCF_000185605.1	2433447	47097317	5.16685
185	GCF_000185705.2	2667088	43940856	6.06972
186	GCF_000185845.1	3016600	42787987	7.05011
187	GCF_000186105.1	3228183	44751103	7.21364
188	GCF_000186505.1	2156012	43562249	4.94927
189	GCF_000186525.1	3668767	42288629	8.67554
190	GCF_000186545.1	854820	44417705	1.9245
191	GCF_000187265.1	1542340	43563900	3.54041
192	GCF_000187895.1	3828632	48053003	7.96752
193	GCF_000188175.1	2020894	42603733	4.74347
194	GCF_000188195.1	2284941	42293594	5.40257
195	GCF_000189595.1	2141502	44622621	4.79914
196	GCF_000189615.1	1773265	49067899	3.6139
197	GCF_000190355.1	5147926	48857659	10.5366
198	GCF_000191805.1	1279419	44047476	2.90464
199	GCF_000191845.1	1682654	46135277	3.64722
200	GCF_000191865.1	2913667	47353842	6.15297
201	GCF_000192165.1	1828463	47568412	3.84386
202	GCF_000195615.1	3327636	47262170	7.0408
203	GCF_000195635.1	3904536	48225599	8.0964
204	GCF_000195655.1	1022910	52562838	1.94607
205	GCF_000204455.1	6909332	49539107	13.9472
206	GCF_000205025.1	2803374	45112639	6.21417
207	GCF_000205165.1	3268459	46058211	7.09637
208	GCF_000209385.2	2098325	49736477	4.21889
209	GCF_000213135.1	458322	46343655	0.988964
210	GCF_000213555.1	5055115	53150663	9.51092
211	GCF_000213575.1	3894420	51285704	7.59358
212	GCF_000214295.1	3521215	52398954	6.72001
213	GCF_000218365.1	1580866	50264796	3.14508
214	GCF_000218465.1	1826270	53094263	3.43967
215	GCF_000218645.2	212533	48442159	0.438736
216	GCF_000218655.1	681871	47728615	1.42864
217	GCF_000220865.1	2527335	51695336	4.8889
218	GCF_000224655.1	2749902	51696126	5.31936
219	GCF_000225705.1	2386495	47077608	5.06928
220	GCF_000225745.1	2818866	49789011	5.66162
221	GCF_000231275.1	2823826	51065906	5.52977
222	GCF_000233455.1	2639260	55414698	4.76274
223	GCF_000233955.1	3643771	52626118	6.92388
224	GCF_000234155.1	3851890	57920132	6.65035
225	GCF_000234175.1	3021709	50174111	6.02245
226	GCF_000235505.1	5435899	53261996	10.206
227	GCF_000235865.1	951092	54544525	1.7437
228	GCF_000235885.1	2801640	54348027	5.155
229	GCF_000235905.1	1801304	57077794	3.15588
230	GCF_000238035.1	5163155	58328111	8.85192
231	GCF_000238615.1	3217535	52769529	6.09734
232	GCF_000239255.1	4769448	55896547	8.53263
233	GCF_000239295.1	1256779	55484677	2.26509
234	GCF_000239335.1	4331157	54388266	7.9634
235	GCF_000239735.1	2511080	56310291	4.45936
236	GCF_000241405.1	2846466	53058374	5.36478
237	GCF_000242155.1	2244574	60041640	3.73836
238	GCF_000242195.1	1369660	56970953	2.40414
239	GCF_000242435.1	2304474	52587480	4.38217
240	GCF_000243175.1	3386945	57782911	5.8615
241	GCF_000243215.1	3677814	56490986	6.51044
242	GCF_000245775.1	2470551	59573883	4.14704
243	GCF_000250875.1	2312925	57770252	4.00366
244	GCF_000261205.1	876212	60476941	1.44884
245	GCF_000261265.1	754791	60857751	1.24025
246	GCF_000273525.1	338684	57669278	0.587287
247	GCF_000296445.1	2060743	55344283	3.7235
248	GCF_000296465.1	3169177	56410358	5.61808
249	GCF_000297775.1	1428473	55127001	2.59124
250	GCF_000297815.1	3933985	60317054	6.52218
251	GCF_000300935.1	2159832	61276325	3.52474
252	GCF_000300955.1	3066252	63456906	4.83202
253	GCF_000307475.1	864081	59482632	1.45266
254	GCF_000310005.2	103475	61200732	0.169075
255	GCF_000315485.1	6174714	63831067	9.67352
256	GCF_000320405.1	3487349	58886147	5.92219
257	GCF_000332875.2	1740150	63617580	2.73533
258	GCF_000344945.2	83567	62079261	0.134613
259	GCF_000344965.2	113176	59380769	0.190594
260	GCF_000344985.2	120566	59328565	0.203217
261	GCF_000345005.2	51030	58103601	0.0878259
262	GCF_000345025.2	108548	61651172	0.176068
263	GCF_000345045.2	90869	62369569	0.145694
264	GCF_000345065.2	128316	58013262	0.221184
265	GCF_000345085.2	75018	63353499	0.118412
266	GCF_000345105.2	93113	56776859	0.163998
267	GCF_000345125.2	73492	60512236	0.12145
268	GCF_000345145.2	76164	60517369	0.125855
269	GCF_000345165.2	133830	62816259	0.21305
270	GCF_000345185.2	63884	59302762	0.107725
271	GCF_000345205.2	89558	61939418	0.14459
272	GCF_000345225.2	97835	63184730	0.15484
273	GCF_000345245.2	87219	65259170	0.13365
274	GCF_000345265.2	98100	58098587	0.168851
275	GCF_000345285.2	105833	64157609	0.164958
276	GCF_000345305.2	85	58977869	0.000144122
277	GCF_000345325.2	232	60458587	0.000383734
278	GCF_000345345.2	542	61394262	0.000882819
279	GCF_000345365.2	175	63645204	0.000274962
280	GCF_000345385.2	112976	61334653	0.184196
281	GCF_000345405.2	402	63098333	0.000637101
282	GCF_000345425.2	37546	60868510	0.0616838
283	GCF_000345445.2	63338	60230773	0.105159
284	GCF_000345465.2	82835	63926278	0.129579
285	GCF_000345485.2	101436	64814369	0.156502
286	GCF_000345505.2	123146	66522881	0.185118
287	GCF_000345525.2	3562	62897470	0.00566318
288	GCF_000345545.2	101501	58957806	0.172159
289	GCF_000345565.2	43983	59694178	0.0736806
290	GCF_000345585.2	87276	65047741	0.134172
291	GCF_000345605.2	122557	62102420	0.197347
292	GCF_000345625.2	88109	61488680	0.143293
293	GCF_000345645.2	82176	64034242	0.128331
294	GCF_000345665.2	130662	61946852	0.210926
295	GCF_000345685.2	209701	64426397	0.325489
296	GCF_000345705.2	84108	64407340	0.130588
297	GCF_000345725.2	87127	61949439	0.140642
298	GCF_000345745.2	223	65462135	0.000340655
299	GCF_000345765.2	197	60864904	0.000323668
300	GCF_000345785.2	204	67372732	0.000302793
301	GCF_000345805.2	710	64163175	0.00110655
302	GCF_000345825.2	610	59582931	0.00102378
303	GCF_000345845.2	1499	62316305	0.00240547
304	GCF_000345865.2	654	66191446	0.000988043
305	GCF_000345885.2	191	60667736	0.00031483
306	GCF_000345905.2	624	62466307	0.000998939
307	GCF_000345925.2	1185	64853333	0.0018272
308	GCF_000345945.2	5593	65007012	0.00860369
309	GCF_000345965.2	478	65265239	0.000732396
310	GCF_000345985.2	4047	62461448	0.0064792
311	GCF_000346005.2	60174	64849552	0.0927902
312	GCF_000346025.2	39340	62381037	0.063064
313	GCF_000346815.2	94101	65968168	0.142646
314	GCF_000346835.2	65585	61280859	0.107024
315	GCF_000346855.2	76390	67988892	0.112357
316	GCF_000346875.2	89179	65111695	0.136963
317	GCF_000381365.1	4912636	64769232	7.58483
318	GCF_000382465.1	5523766	66421177	8.31627
319	GCF_000398925.1	3140590	68224815	4.6033
320	GCF_000400875.1	553721	68408446	0.809434
321	GCF_000411235.1	583172	64908576	0.898451
322	GCF_000411255.1	3527210	68585752	5.14277
323	GCF_000411275.1	2353011	67257549	3.49851
324	GCF_000411295.1	3444937	65925806	5.22548
325	GCF_000411315.1	9151122	74503813	12.2828
326	GCF_000411335.1	1226943	67730398	1.81151
327	GCF_000411355.1	1855228	65116902	2.84907
328	GCF_000411395.1	2196490	68175283	3.22183
329	GCF_000411415.1	2365712	67497655	3.50488
330	GCF_000411435.1	1188170	63753149	1.8637
331	GCF_000411475.1	1644207	69712054	2.35857
332	GCF_000411495.1	7668925	76157225	10.0699
333	GCF_000411515.1	2144843	71070686	3.0179
334	GCF_000411535.1	1931960	69284179	2.78846
335	GCF_000412335.2	4577479	69703341	6.56709
336	GCF_000413355.1	2787551	71037066	3.92408
337	GCF_000413375.1	2328172	72056904	3.23102
338	GCF_000455765.1	116528	68164154	0.170952
339	GCF_000466385.1	5245020	72993349	7.18561
340	GCF_000466445.2	1708579	68045805	2.51092
341	GCF_000466465.2	6513017	71722528	9.08085
342	GCF_000466485.1	1890147	70678708	2.67428
343	GCF_000466525.1	712577	71439784	0.997451
344	GCF_000466565.1	3232527	71701643	4.5083
345	GCF_000466605.1	2964338	75114724	3.94641
346	GCF_000468015.1	2970515	67780758	4.38253
347	GCF_000469305.1	1859813	73004831	2.54752
348	GCF_000469345.1	3143729	69817153	4.5028
349	GCF_000469365.1	2442670	73495432	3.32357
350	GCF_000469425.1	1534858	74986364	2.04685
351	GCF_000469445.2	1529721	76567254	1.99788
352	GCF_000478505.2	5572986	74203021	7.51046
353	GCF_000479045.1	3000633	72752343	4.12445
354	GCF_000479185.1	1159058	70475781	1.64462
355	GCF_000479205.1	888306	77217646	1.15039
356	GCF_000479225.1	496941	75346989	0.659537
357	GCF_000479245.1	249165	75467117	0.330164
358	GCF_000479265.1	1200921	70007288	1.71542
359	GCF_000479285.1	466786	73053098	0.638968
360	GCF_000507845.1	2323090	74039022	3.13766
361	GCF_000507865.1	1865197	71715603	2.60082
362	GCF_000517745.1	1240372	78577171	1.57854
363	GCF_000517805.1	443672	80442643	0.551538
364	GCF_000523555.1	1169506	74222010	1.57569
365	GCF_000527215.1	2707310	83039332	3.26027
366	GCF_000527235.1	2524483	81055876	3.1145
367	GCF_000527255.1	332054	73089755	0.45431
368	GCF_000527275.1	1217152	78911697	1.54242
369	GCF_000527295.1	474644	80593067	0.588939
370	GCF_000527315.1	995773	76709748	1.2981
371	GCF_000527335.1	530722	79491509	0.667646
372	GCF_000690925.1	406651	72272197	0.562666
373	GCF_000760655.1	1295644	75950491	1.70591
374	GCF_000763035.1	1974532	76697947	2.57443
375	GCF_000763055.1	2014149	76225474	2.64236
376	GCF_000969835.1	6079973	80545159	7.54853
377	GCF_000969845.1	6405464	80886962	7.91903
378	GCF_001078315.1	2368945	81026213	2.92368
379	GCF_001078425.1	2248358	82722674	2.71795
380	GCF_001078435.1	2317120	86602137	2.67559
381	GCF_001078445.1	3538747	77605039	4.55994
382	GCF_001078555.1	1585775	81730803	1.94024
383	GCF_001185845.1	2324078	84966349	2.73529
384	GCF_001571425.1	2836677	82387963	3.44307
385	GCF_001578555.1	2906731	84949914	3.4217
386	GCF_001578585.1	1453152	75649160	1.92091
387	GCF_001578645.1	1101340	79790462	1.38029
388	GCF_001580195.1	709246	79048896	0.897224
389	GCF_001641065.1	3674200	84881912	4.3286
390	GCF_001647615.1	455412	86134269	0.528723
391	GCF_001807055.1	4223068	85454403	4.9419
392	GCF_001807785.1	2085127	84540016	2.46644
393	GCF_001807865.1	3939322	79748442	4.93969
394	GCF_001807895.1	4297909	83511716	5.14647
395	GCF_001808325.1	3446935	86090440	4.00385
396	GCF_001808745.1	1704364	81864841	2.08192
397	GCF_001808795.1	368599	86995243	0.4237
398	GCF_001809065.1	296376	88533733	0.334761
399	GCF_001809145.1	282902	83695902	0.338012
400	GCF_001809445.1	1989461	86706316	2.29448
401	GCF_001809485.1	867391	87755365	0.988419
402	GCF_001809495.1	65877	80090742	0.082253
403	GCF_001809645.1	659877	89550257	0.736879
404	GCF_001810115.1	726196	87458621	0.830331
405	GCF_001810435.1	109802	85156802	0.128941
406	GCF_001810475.1	1947292	85278345	2.28345
407	GCF_001810595.1	324412	87792208	0.369523
408	GCF_001810625.1	140661	84190994	0.167074
409	GCF_001810915.1	337440	88166469	0.382731
410	GCF_001811035.1	138831	90476252	0.153445
411	GCF_001811205.1	434504	82166507	0.528809
412	GCF_001811225.1	2444232	92975987	2.62889
413	GCF_001811285.1	575498	86327441	0.666645
414	GCF_001811595.1	298516	81484266	0.366348
415	GCF_001811695.1	4876623	93684553	5.20537
416	GCF_001811715.1	203234	89090482	0.228121
417	GCF_001811805.1	491677	87585485	0.561368
418	GCF_001811815.1	694648	91897166	0.755897
419	GCF_001812015.1	1639093	89459864	1.83221
420	GCF_001812445.1	71586	92886005	0.0770687
421	GCF_001812505.1	1069353	90619958	1.18004
422	GCF_001812535.1	408112	86018482	0.474447
423	GCF_001813025.1	3396954	92081936	3.68906
424	GCF_001813035.1	979170	86109217	1.13713
425	GCF_001813195.1	767839	88590941	0.866724
426	GCF_001813255.1	60837	84652284	0.0718669
427	GCF_001813275.1	199885	91353031	0.218805
428	GCF_001813405.1	2345547	88813863	2.64097
429	GCF_001813585.1	178142	94351276	0.188807
430	GCF_001813745.1	255238	83377451	0.306124
431	GCF_001813905.1	644619	95438027	0.675432
432	GCF_001814065.1	184150	91035576	0.202284
433	GCF_001814235.1	355845	87370104	0.407285
434	GCF_001814745.1	1218659	93894979	1.2979
435	GCF_001814765.1	983680	88262188	1.1145
436	GCF_001814855.1	3147859	93842396	3.35441
437	GCF_001815345.1	1142621	91100062	1.25425
438	GCF_001815665.1	419972	91588207	0.458544
439	GCF_001815745.1	389385	93478889	0.416549
440	GCF_001815825.1	611599	86081209	0.710491
441	GCF_001815925.1	4468819	98866393	4.52006
442	GCF_001835885.1	338657	94076109	0.359982
443	GCF_001836465.1	650094	90111828	0.72143
444	GCF_001836495.1	221459	84871572	0.260934
445	GCF_001836545.1	315588	96190767	0.328086
446	GCF_001836595.1	579355	98166949	0.590173
447	GCF_001837035.1	29023	95365230	0.0304335
448	GCF_001837075.1	35282	90651060	0.0389207
449	GCF_001837115.1	694905	93853009	0.740418
450	GCF_001837215.1	629395	96206509	0.654212
451	GCF_001837535.1	119811	87043415	0.137645
452	GCF_001838125.1	298930	94722536	0.315585
453	GCF_001838135.1	2125152	93808341	2.26542
454	GCF_001838215.1	632553	94556798	0.668966
455	GCF_001838615.1	2118702	96210027	2.20216
456	GCF_001839265.1	353918	97847557	0.361703
457	GCF_001839285.1	389575	91838753	0.424195
458	GCF_001839345.1	352664	97595171	0.361354
459	GCF_001857645.1	1644037	93657055	1.75538

## Sheet: Supplementary Table 7
Supplementary Table 7: Relative abundances of taxa in the mock (mix/staggered and gut/even) communities.
Mix/Staggered genomes	Relative Abundance			Gut/Even genomes	Relative Abundance
Escherichia coli ATCC 700926	0.179712			Enterobacter cloacae subsp cloacae ATCC 13047	0.083
Porphyromonas gingivalis ATCC 33277	0.0987275			Yersinia enterocolitica ATCC 27729	0.083
Rhodobacter sphaeroides ATCC 17029	0.109542			Salmonella enterica subsp enterica ATCC 9150	0.083
Staphylococcus epidermidis ATCC 12228	0.123018			Bacteroides fragilis ATCC 25285	0.083
Streptococcus mutans ATCC 700610	0.140274			Clostridioides difficile ATCC 9689	0.083
Bacillus cereus ATCC 10987	0.0163162			Helicobacter pylori ATCC 700392	0.083
Clostridium beijerinckii ATCC 35702	0.0165868			Lactiplantibacillus plantarum ATCC BAA 793	0.083
Pseudomonas aeruginosa ATCC 9027	0.0168666			Fusobacterium nucleatum subsp nucleatum ATCC 25586	0.083
Staphylococcus aureus subsp aureus ATCC BAA 1556	0.0171559			Bifidobacterium adolescentis ATCC 15703	0.083
Streptococcus agalactiae ATCC BAA 611	0.0174554			Bacteroides vulgatus ATCC 8482	0.083
Acinetobacter baumannii ATCC 17978	0.00177655			Enterococcus faecalis ATCC 700802	0.083
Cutibacterium acnes ATCC 11828	0.00177971			Escherichia coli ATCC 700926	0.083
Helicobacter pylori ATCC 700392	0.00178288
Lactobacillus gasseri ATCC 33323	0.00178607
Neisseria meningitidis ATCC BAA 335	0.00178926
Phocaeicola vulgatus ATCC 8482	0.00179247
Bifidobacterium adolescentis ATCC 15703	0.000199521
Deinococcus radiodurans ATCC BAA 816	0.000199561
Enterococcus faecalis ATCC 47077	0.000199601
Schaalia odontolytica ATCC 17982	0.000199641

## Sheet: Supplementary Table 8
Supplementary Table8: Performance comparison of StrainIQ against KrakenUniq, MetaPhlAn, and CLARK methods at the species, genus, and strain levels.
	Genus		Species		Strain
	Sensitivity	Specificity	Sensitivity	Specificity	Sensitivity	Specificity
StrainIQ	0.958687	0.97619	0.888591	0.864236	0.867194	0.751467
KrakenUniq	0.966142	1	0.937826	0.944633	0.695642	0.52881
MetaPhlAn	0.800683	0.97619	0.983438	0.169764	N/A	N/A
CLARK	1	0.0350877	0.57744	0.968832	N/A	N/A

## Sheet: Supplementary Table 9
Supplementary Table 9: Description of the cutoff and performance scores of bodysite-specific DSEMs built using corresponding reference genomes.
Bodysite	Sensitivity	Specificity	F1 Score	# of genomes	cutoff
Blood	0.821944	0.624571	0.785901	54	0.00108974
Urogenital tract	0.94	0.723295	0.707715	359	2.37812e-08
Gastrointestinal tract	0.867194	0.751467	0.820636	471	3.16e-09
